# Supplementary material for: Polymorphic factor H-binding activity of CspA protects Lyme borreliae from the host complement in feeding ticks to facilitate tick-to-host transmission
Source: PubMed Central journal article supplement (PMC5993331; doi:10.1371/journal.ppat.1007106), 2018-05-29
Supplement: ppat.1007106.s014.pdf [file ppat.1007106.s014.pdf]

1 **S1 Table. CspA<sub>B31</sub> and CspA<sub>B31</sub>L246D display indistinguishable affinity in binding to C7, C9**  
 2 **and plasminogen.**

| <b>Ligand</b>      | <b>CspA<sub>B31</sub><br/>protein</b> | <b>----- Surface Plasmon Resonance -----</b> |                                                                    |                                         | <b>p<sup>a</sup></b> |
|--------------------|---------------------------------------|----------------------------------------------|--------------------------------------------------------------------|-----------------------------------------|----------------------|
|                    |                                       | <b>K<sub>D</sub> (μM)</b>                    | <b>k<sub>on</sub> (10<sup>5</sup>s<sup>-1</sup>M<sup>-1</sup>)</b> | <b>k<sub>off</sub> (s<sup>-1</sup>)</b> |                      |
| <b>C7</b>          | <b>CspA<sub>B31</sub></b>             | <b>5.26±1.57</b>                             | 0.94±0.01                                                          | 0.45±0.04                               | 0.45                 |
|                    | <b>CspA<sub>B31</sub>L246D</b>        | <b>3.50±1.40</b>                             | 1.43±0.04                                                          | 0.38±0.02                               |                      |
| <b>C9</b>          | <b>CspA<sub>B31</sub></b>             | <b>5.47±0.66</b>                             | 0.60±0.05                                                          | 0.32±0.01                               | 0.94                 |
|                    | <b>CspA<sub>B31</sub>L246D</b>        | <b>5.40±0.63</b>                             | 0.70±0.01                                                          | 0.36±0.01                               |                      |
| <b>Plasminogen</b> | <b>CspA<sub>B31</sub></b>             | <b>6.35±1.02</b>                             | 0.43±0.06                                                          | 0.26±0.01                               | 0.94                 |
|                    | <b>CspA<sub>B31</sub>L246D</b>        | <b>6.48±1.51</b>                             | 0.49±0.01                                                          | 0.29±0.03                               |                      |

3 All values represent the mean ± SEM of three experiments.

4 <sup>a</sup>The statistical significance for the binding of a particular ligand to CspA<sub>B31</sub> or CspA<sub>B31</sub>L246D  
 5 was determined using T-test.

6
